# Supplementary material for: An integrative approach unveils FOSL1 as an oncogene vulnerability in KRAS-driven lung and pancreatic cancer
Source: PubMed Central journal article supplement (PMC5321758; doi:10.1038/ncomms14294), 2017-02-21
Supplement: ncomms14294-s2.pdf [file ncomms14294-s2.pdf]

**Editorial Note:** this manuscript has been previously reviewed at another journal that is not operating a transparent peer review scheme. This document only contains reviewer comments and rebuttal letters for versions considered at Nature Communications.
